# Supplementary material for: Final overall survival analysis of the phase 3 HERITAGE study demonstrates equivalence of trastuzumab-dkst to trastuzumab in HER2-positive metastatic breast cancer
Source: PubMed Central journal article supplement (PMC8260531; doi:10.1007/s10549-021-06197-5), 2021-06-14
Supplement: 10549_2021_6197_MOESM2_ESM.pdf [file 10549_2021_6197_MOESM2_ESM.pdf]

**Article title:** Final Overall Survival Analysis of the Phase 3 HERITAGE Study Demonstrates Equivalence of Trastuzumab-dkst to Trastuzumab in HER2-Positive Metastatic Breast Cancer

**Journal name:** *Breast Cancer Research and Treatment*

**Authors:** Hope S. Rugo,<sup>1</sup> Eduardo J. Pennella,<sup>2</sup> Unmesh Gopalakrishnan,<sup>3</sup> Miguel Hernandez-Bronchud,<sup>4</sup> Jay Herson,<sup>5</sup> Hans Friedrich Koch,<sup>6</sup> Subramanian Loganathan,<sup>7</sup> Sarika Deodhar,<sup>7</sup> Ashwani Marwah,<sup>7</sup> Alexey Manikhas,<sup>8</sup> Igor Bondarenko,<sup>9</sup> Guzel Mukhametshina,<sup>10</sup> Gia Nemsadze,<sup>11</sup> Joseph D. Parra,<sup>12</sup> Maria Luisa T. Abesamis-Tiambeng,<sup>13</sup> Kakhaber Baramidze,<sup>14</sup> Charuwan Akewanlop,<sup>15</sup> Ihor Vynnychenko,<sup>16</sup> Virote Sriuranpong,<sup>17</sup> Gopichand Mamillapalli,<sup>18</sup> Sirshendu Roy,<sup>19</sup> Eduardo Patricio Yanez Ruiz,<sup>20</sup> Abhijit Barve,<sup>2</sup> Adolfo Fuentes-Alburo,<sup>2</sup> Cornelius F. Waller<sup>21</sup>

**Corresponding author:** Hope S. Rugo, Professor of Medicine, University of California San Francisco Helen Diller Family Comprehensive Cancer Center, 1825 4th St, 3rd Floor BCC San Francisco, CA 94158, Hope.Rugo@ucsf.edu

## ONLINE RESOURCE 2

**Supplementary Table.** Most Common Systemic Breast Cancer Therapies After Ending Trastuzumab

| Therapy                                             | Patients, n (%) |                        |                    |
|-----------------------------------------------------|-----------------|------------------------|--------------------|
|                                                     | Trastuzumab-    |                        | Overall<br>(N=343) |
|                                                     | dkst<br>(N=179) | Trastuzumab<br>(N=164) |                    |
| At least 1 follow-up breast cancer therapy reported | 90 (50.3)       | 79 (48.2)              | 169 (49.3)         |
| Antineoplastic agents                               | 82 (45.8)       | 72 (43.9)              | 154 (44.9)         |
| Capecitabine                                        | 54 (30.2)       | 40 (24.4)              | 94 (27.4)          |
| Trastuzumab                                         | 22 (12.3)       | 25 (15.2)              | 47 (13.7)          |
| Cyclophosphamide                                    | 20 (11.2)       | 20 (12.2)              | 40 (11.7)          |
| Lapatinib                                           | 19 (10.6)       | 12 (7.3)               | 31 (9.0)           |
| Doxorubicin                                         | 14 (7.8)        | 13 (7.9)               | 27 (7.9)           |
| Fluorouracil                                        | 9 (5.0)         | 9 (5.5)                | 18 (5.2)           |
| Paclitaxel                                          | 10 (5.6)        | 5 (3.0)                | 15 (4.4)           |
| Endocrine therapy                                   | 17 (9.5)        | 24 (14.6)              | 41 (12.0)          |
