# Supplementary material for: Final overall survival analysis of the phase 3 HERITAGE study demonstrates equivalence of trastuzumab-dkst to trastuzumab in HER2-positive metastatic breast cancer
Source: Springer Nature journal article supplement (doi:10.1007/s10549-021-06197-5), 2021-06-14
Supplement: MOESM1 [file 19258270]

**Article title:** Final Overall Survival Analysis of the Phase 3 HERITAGE Study Demonstrates Equivalence of Trastuzumab-dkst to Trastuzumab in HER2-Positive Metastatic Breast Cancer

**Journal name:** *Breast Cancer Research and Treatment*

**Authors:** Hope S. Rugo,<sup>1</sup> Eduardo J. Pennella,<sup>2</sup> Unmesh Gopalakrishnan,<sup>3</sup> Miguel Hernandez-Bronchud,<sup>4</sup> Jay Herson,<sup>5</sup> Hans Friedrich Koch,<sup>6</sup> Subramanian Loganathan,<sup>7</sup> Sarika Deodhar,<sup>7</sup> Ashwani Marwah,<sup>7</sup> Alexey Manikhas,<sup>8</sup> Igor Bondarenko,<sup>9</sup> Guzel Mukhametshina,<sup>10</sup> Gia Nemsadze,<sup>11</sup> Joseph D. Parra,<sup>12</sup> Maria Luisa T. Abesamis-Tiambeng,<sup>13</sup> Kakhaber Baramidze,<sup>14</sup> Charuwan Akewanlop,<sup>15</sup> Ihor Vynnychenko,<sup>16</sup> Virote Sriuranpong,<sup>17</sup> Gopichand Mamillapalli,<sup>18</sup> Sirshendu Roy,<sup>19</sup> Eduardo Patricio Yanez Ruiz,<sup>20</sup> Abhijit Barve,<sup>2</sup> Adolfo Fuentes-Alburo,<sup>2</sup> Cornelius F. Waller<sup>21</sup>

**Corresponding author:** Hope S. Rugo, Professor of Medicine, University of California San Francisco Helen Diller Family Comprehensive Cancer Center, 1825 4th St, 3rd Floor BCC San Francisco, CA 94158, Hope.Rugo@ucsf.edu

## ONLINE RESOURCE 1

**Supplementary Figure. Study design.**

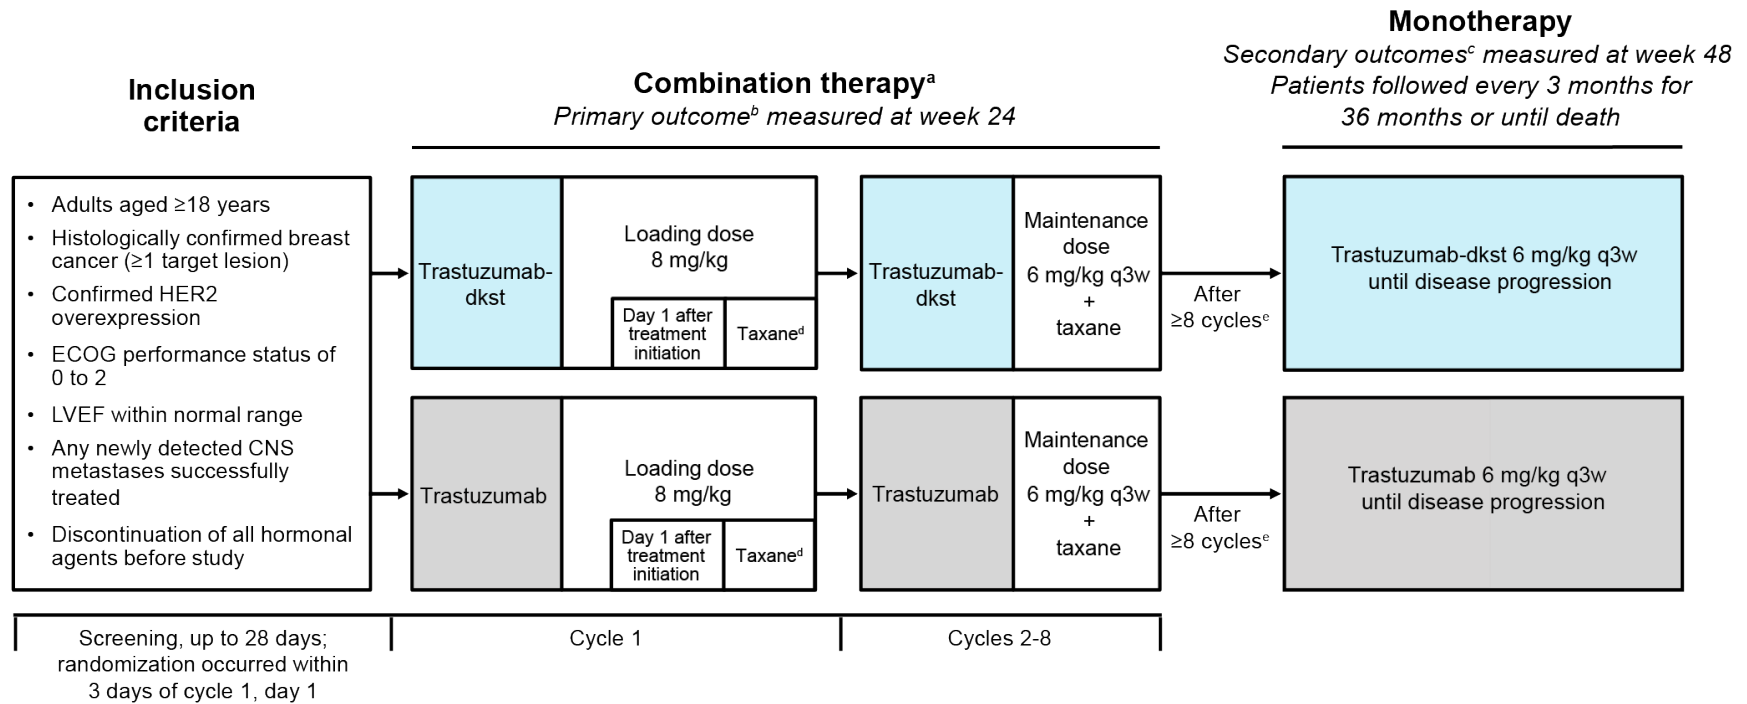

CNS, central nervous system; ECOG, Eastern Cooperative Oncology Group; LVEF, left ventricular ejection fraction; q3w, every 3 weeks. <sup>a</sup>Patients with stable disease could continue with combination therapy beyond 8 cycles. <sup>b</sup>Objective overall response rate (defined as complete or partial response). <sup>c</sup>Including overall survival, progression-free survival, and time to progression. <sup>d</sup>Taxanes consisted of either docetaxel 75 mg/m<sup>2</sup> q3w or paclitaxel 80 mg/m<sup>2</sup> weekly administered 30 minutes after treatment. <sup>e</sup>Patients with complete or partial response proceeded to the monotherapy

phase of the study and patients with stable disease after  $\geq 8$  cycles proceeded to the monotherapy phase of the study at the investigator's discretion. 1 cycle = 3 weeks.
